# Supplementary material
Source: HighWire-hosted journal article supplement (https://bmjopen.bmj.com/content/9/8/e026058)
Supplement: inline-supplementary-material-2 [file inline-supplementary-material-2.pdf]

## Consolidated criteria for reporting qualitative studies (COREQ): 32-item checklist

| No                                                 | Item                    | Guide questions/description                                 |                                                                                          | Page |
|----------------------------------------------------|-------------------------|-------------------------------------------------------------|------------------------------------------------------------------------------------------|------|
| <b>Domain 1:<br/>Research team and reflexivity</b> |                         |                                                             |                                                                                          |      |
| Personal Characteristics                           |                         |                                                             |                                                                                          |      |
| 1.                                                 | Interviewer/facilitator | Which author/s conducted the interview or focus group?      | MKDH                                                                                     | 5    |
| 2.                                                 | Credentials             | What were the researcher's credentials? <i>E.g. PhD, MD</i> | MPH, BSc                                                                                 | 1    |
| 3.                                                 | Occupation              | What was their occupation at the time of the study?         | Research assistant                                                                       | 1    |
| 4.                                                 | Gender                  | Was the researcher male or female?                          | F                                                                                        | 5    |
| 5.                                                 | Experience and training | What experience or training did the researcher have?        | Training in qualitative research and previous experience in health related communication | 5    |
| Relationship with participants                     |                         |                                                             |                                                                                          |      |
| 6.                                                 | Relationship            | Was a relationship                                          | No                                                                                       | 5    |

| No                            | Item                                     | Guide questions/description                                                                                                                                     | Page                                                                                                                                   |
|-------------------------------|------------------------------------------|-----------------------------------------------------------------------------------------------------------------------------------------------------------------|----------------------------------------------------------------------------------------------------------------------------------------|
|                               | established                              | established prior to study commencement?                                                                                                                        |                                                                                                                                        |
| 7.                            | Participant knowledge of the interviewer | What did the participants know about the researcher? e.g. <i>personal goals, reasons for doing the research</i>                                                 | Participants were informed that MKDH was a university researcher conducting a study 5                                                  |
| 8.                            | Interviewer characteristics              | What characteristics were reported about the interviewer/facilitator? e.g. <i>Bias, assumptions, reasons and interests in the research topic</i>                | Informed MKDH was interested in improving NHS Health Checks 5                                                                          |
| <b>Domain 2: study design</b> |                                          |                                                                                                                                                                 |                                                                                                                                        |
| Theoretical framework         |                                          |                                                                                                                                                                 |                                                                                                                                        |
| 9.                            | Methodological orientation and Theory    | What methodological orientation was stated to underpin the study? e.g. <i>grounded theory, discourse analysis, ethnography, phenomenology, content analysis</i> | Inductive thematic analysis with coding of transcripts according to latent and manifest content and developing a thematic framework. 6 |
| Participant selection         |                                          |                                                                                                                                                                 |                                                                                                                                        |

| No              | Item                         | Guide questions/description                                                               |                                                                          | Page |
|-----------------|------------------------------|-------------------------------------------------------------------------------------------|--------------------------------------------------------------------------|------|
| 10.             | Sampling                     | How were participants selected? <i>e.g. purposive, convenience, consecutive, snowball</i> | Purposive maximum diversity sample                                       | 5    |
| 11.             | Method of approach           | How were participants approached? <i>e.g. face-to-face, telephone, mail, email</i>        | Mail and face to face                                                    | 5    |
| 12.             | Sample size                  | How many participants were in the study?                                                  | 18                                                                       | 6    |
| 13.             | Non-participation            | How many people refused to participate or dropped out? Reasons?                           | None                                                                     | 6    |
| Setting         |                              |                                                                                           |                                                                          |      |
| 14.             | Setting of data collection   | Where was the data collected? <i>e.g. home, clinic, workplace</i>                         | General practice clinic                                                  | 5    |
| 15.             | Presence of non-participants | Was anyone else present besides the participants and researchers?                         | No one                                                                   | 5    |
| 16.             | Description of sample        | What are the important characteristics of the sample? <i>e.g. demographic data, date</i>  | Demographic                                                              | 7    |
| Data collection |                              |                                                                                           |                                                                          |      |
| 17.             | Interview guide              | Were questions, prompts, guides provided by the authors? Was it pilot tested?             | Pilot tested<br>The topic guide [box 1] was piloted, used open questions | 5/6  |

| No                                      | Item                   | Guide questions/description                                              |                                                                          | Page |
|-----------------------------------------|------------------------|--------------------------------------------------------------------------|--------------------------------------------------------------------------|------|
|                                         |                        |                                                                          | and probes to gather more detail, and was adapted as new themes emerged. |      |
| 18.                                     | Repeat interviews      | Were repeat interviews carried out? If yes, how many?                    | No                                                                       | 5    |
| 19.                                     | Audio/visual recording | Did the research use audio or visual recording to collect the data?      | Yes audio recording                                                      | 5    |
| 20.                                     | Field notes            | Were field notes made during and/or after the interview or focus group?  | Yes                                                                      | 5    |
| 21.                                     | Duration               | What was the duration of the interviews or focus group?                  | 10-40 minutes                                                            | 5    |
| 22.                                     | Data saturation        | Was data saturation discussed?                                           | Yes                                                                      | 5    |
| 23.                                     | Transcripts returned   | Were transcripts returned to participants for comment and/or correction? | No                                                                       | 5    |
| <b>Domain 3: analysis and findingsz</b> |                        |                                                                          |                                                                          |      |
| Data analysis                           |                        |                                                                          |                                                                          |      |
| 24.                                     | Number of data         | How many data coders                                                     | 2                                                                        | 6    |

| No               | Item                           | Guide questions/description                                                                                                                 |                                     | Page |
|------------------|--------------------------------|---------------------------------------------------------------------------------------------------------------------------------------------|-------------------------------------|------|
|                  | coders                         | coded the data?                                                                                                                             |                                     |      |
| 25.              | Description of the coding tree | Did authors provide a description of the coding tree?                                                                                       | No                                  | 6    |
| 26.              | Derivation of themes           | Were themes identified in advance or derived from the data?                                                                                 | Derived from data                   | 6    |
| 27.              | Software                       | What software, if applicable, was used to manage the data?                                                                                  | NVIVO 10                            | 6    |
| 28.              | Participant checking           | Did participants provide feedback on the findings?                                                                                          | No                                  | 6    |
| <b>Reporting</b> |                                |                                                                                                                                             |                                     |      |
| 29.              | Quotations presented           | Were participant quotations presented to illustrate the themes / findings? Was each quotation identified?<br><i>e.g. participant number</i> | Yes; each participant is identified | 7-11 |
| 30.              | Data and findings consistent   | Was there consistency between the data presented and the findings?                                                                          | Yes                                 | 7-11 |
| 31.              | Clarity of major themes        | Were major themes clearly presented in the findings?                                                                                        | Yes                                 | 7    |
| 32.              | Clarity of minor themes        | Is there a description of diverse cases or discussion of minor themes?                                                                      | Yes                                 | 11   |
